# Supplementary figures and images for: Enhanced bile canaliculi formation enabling direct recovery of biliary metabolites of hepatocytes in 3D collagen gel microcavities
Source: Royal Society of Chemistry journal article supplement (doi:10.1039/c2lc40046d), 2012-01-01

Supp. Fig. 1. Structure of fabricated collagen gel microcavity

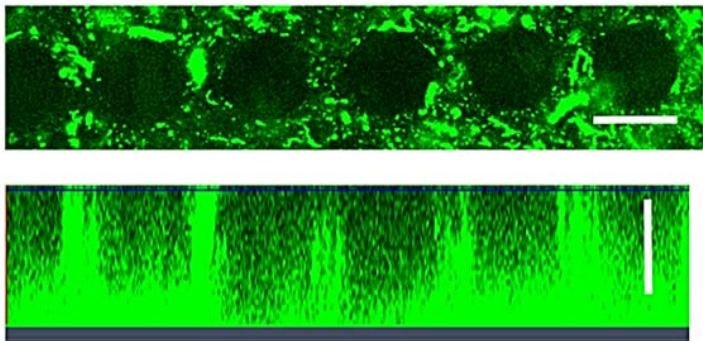

Supp. Fig. 2.

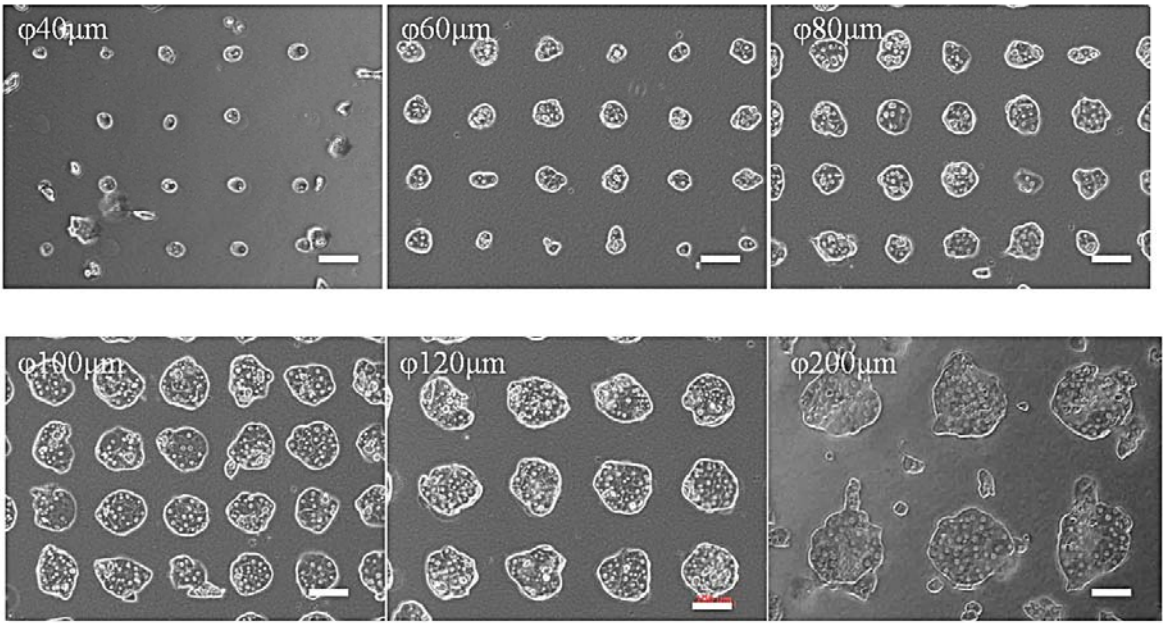

Supp. Fig. 3. A

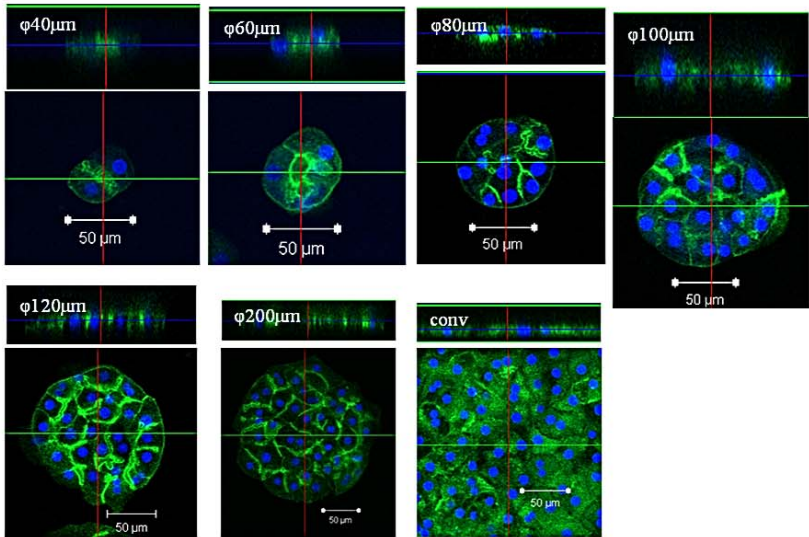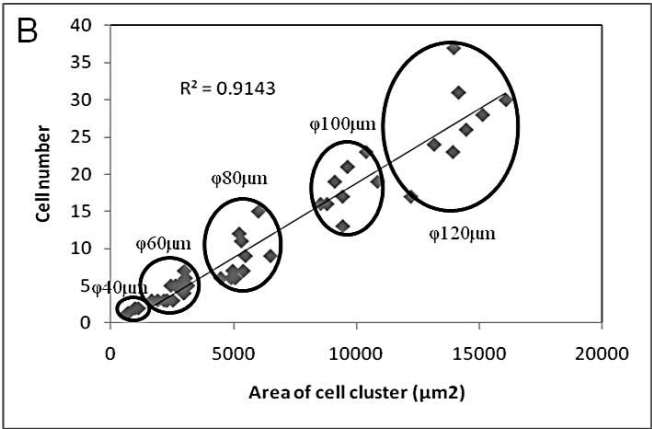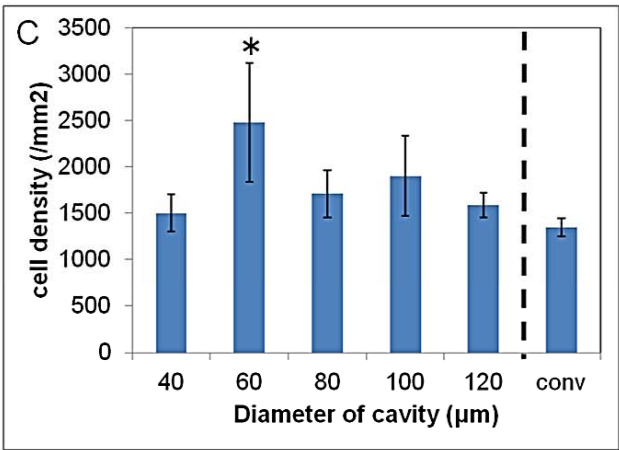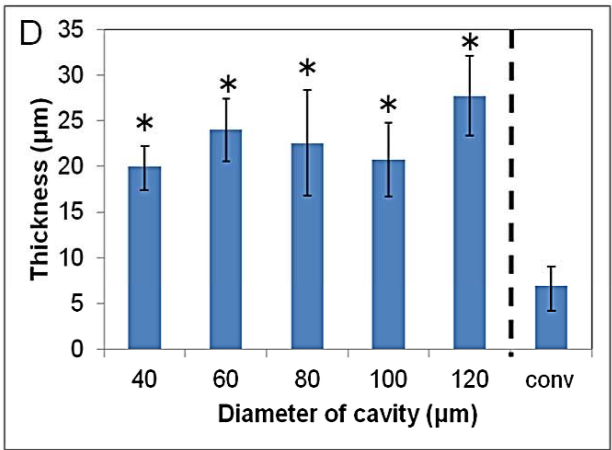

Supp. Fig. 4.

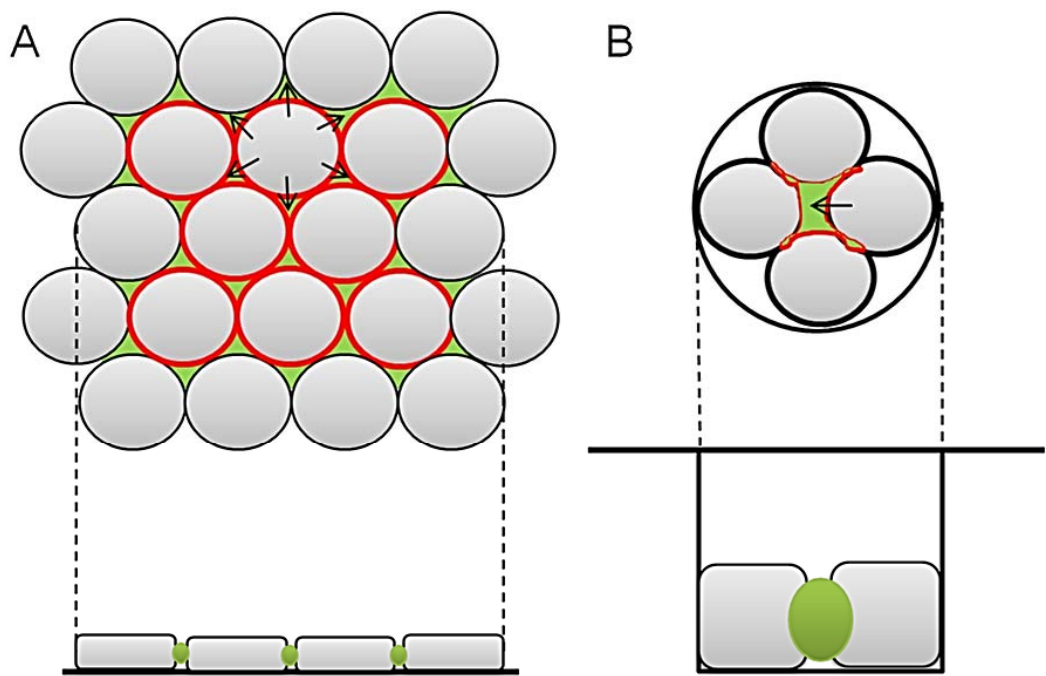

Supplement: c2lc40046d.pdf [file c2lc40046d.pdf]
